# Supplementary material
Source: PubMed Central journal article supplement (PMC4268269)

## Supplemental material

### Supplemental Figure legends

**Figure S1. The MMP and cathepsin gene expression profile in SAE cells exposed to UV-treated RSV.** Gene expression for (A) MMPs and (B) cathepsins was performed on SAE cells treated with mock, viable RSV or UV-treated RSV. Graphs are represented as mean  $\pm$  S.E.M., where n=10 per group.

**Figure S2. RSV does not induce TIMP release from SAE cells.** TIMPs media levels were determined by multiplex analysis following RSV infection. Graphs are represented as mean  $\pm$  S.E.M, where n=10 per group. p values shown, comparing both treatments connected by a line.

**Figure S3. Transfection efficiency of siRNA delivery to SAE cells.** Trif, MDA5, RIG-I, LGP2 and MAVS gene and protein expression were analyzed in SAE cells following siRNA transfection by qPCR. Three individual transfections are represented here. Graphs are represented as mean  $\pm$  S.E.M. p values shown, comparing both treatments connected by a line.

**Figure S4. The MMP and cathepsin gene expression profile in mice exposed to RSV and ribavirin.** Gene expression for (A) MMPs and (B) cathepsins was performed on FVB/NJ mice treated with mock plus vehicle, RSV plus vehicle or RSV plus ribavirin. Graphs are represented as mean  $\pm$  S.E.M., where n=10 per group.

**Figure S5. RSV induces ADAM17 and emmprin expression in the airways.** (A) ADAM17 gene and protein expression were analyzed in wild-type mouse lung following RSV infection, by qPCR and immunoblot. \*Represents a p value less than 0.05 compared to mock treated mice. (B) Emmprin media levels were determined by multiplex analysis

following RSV infection in SAE cells. Graphs are represented as mean  $\pm$  S.E.M. p values shown, comparing both treatments connected by a line. Each measurement was performed 3 times on 12 animals or cell culture samples.

A

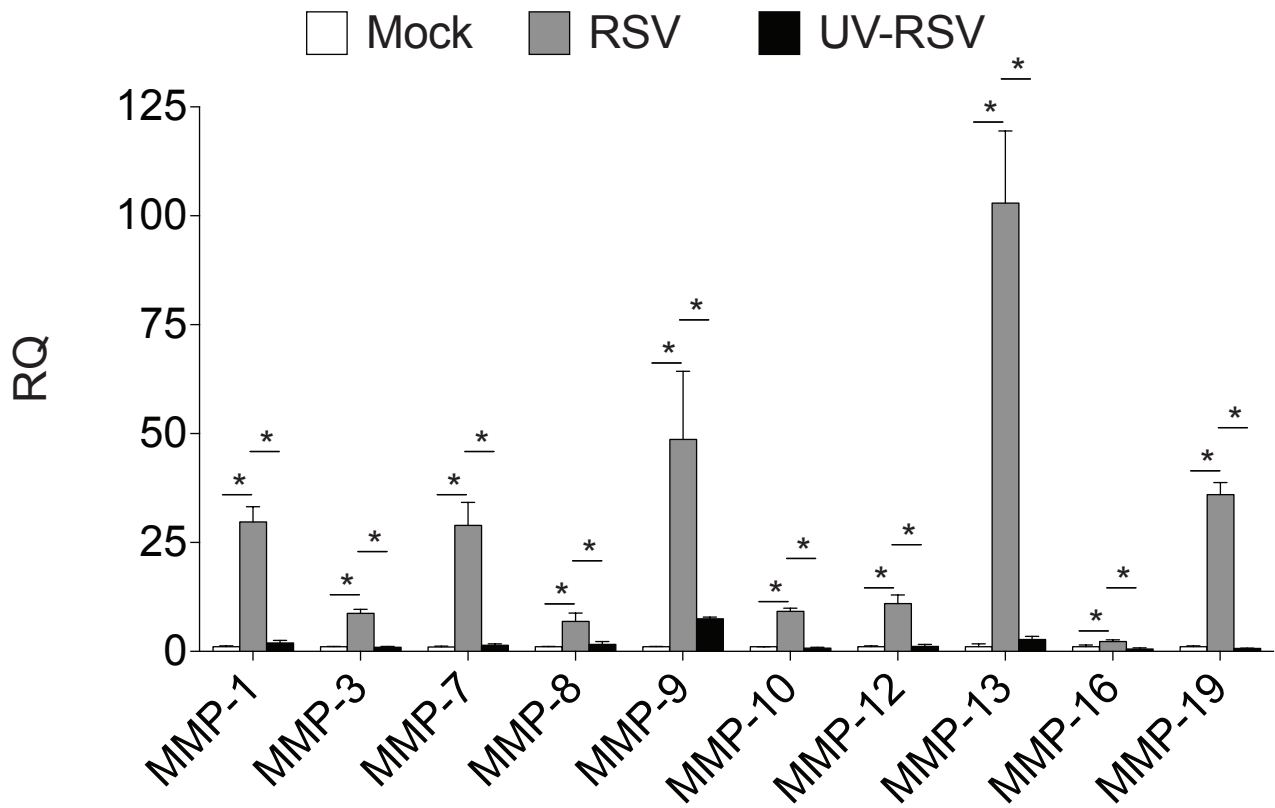

B

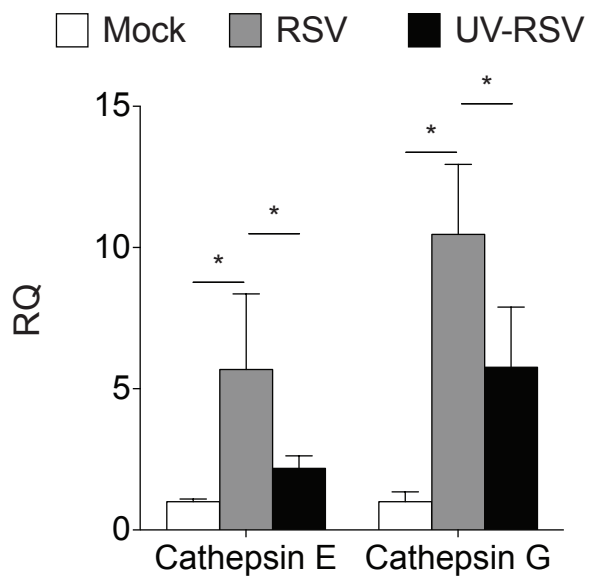

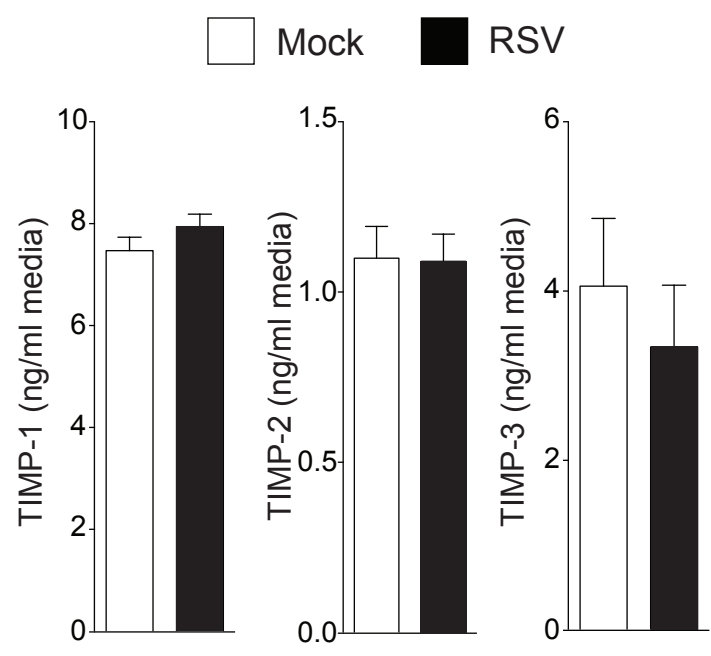

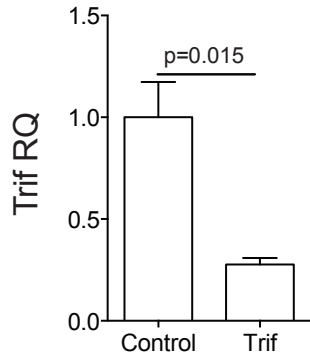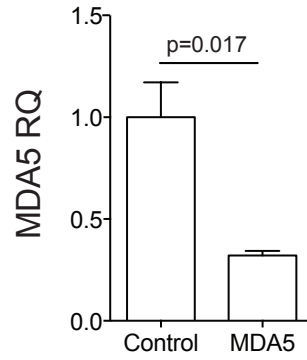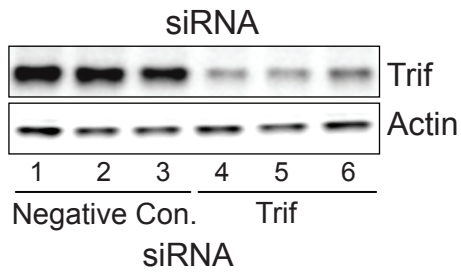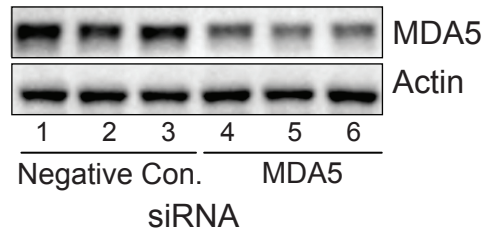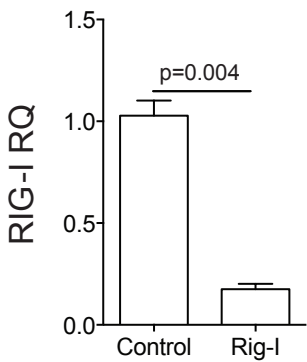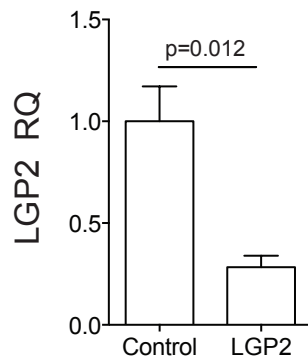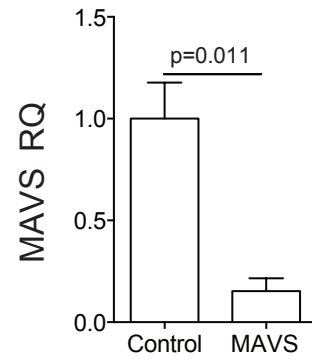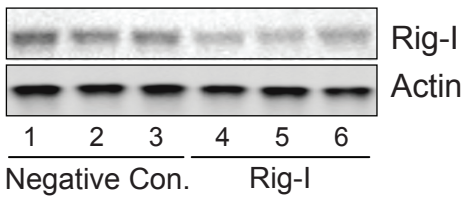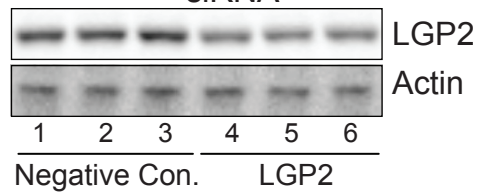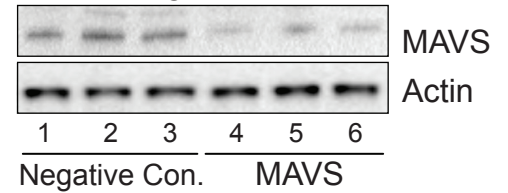

A

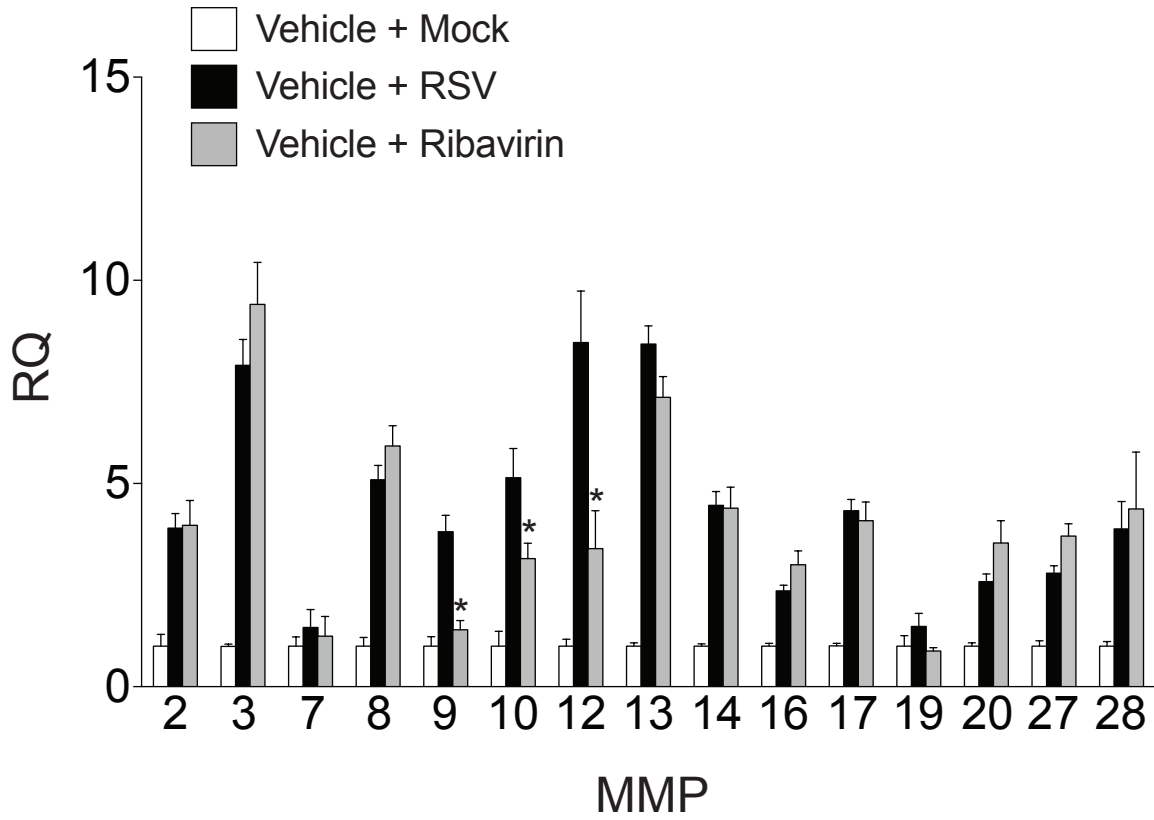

B

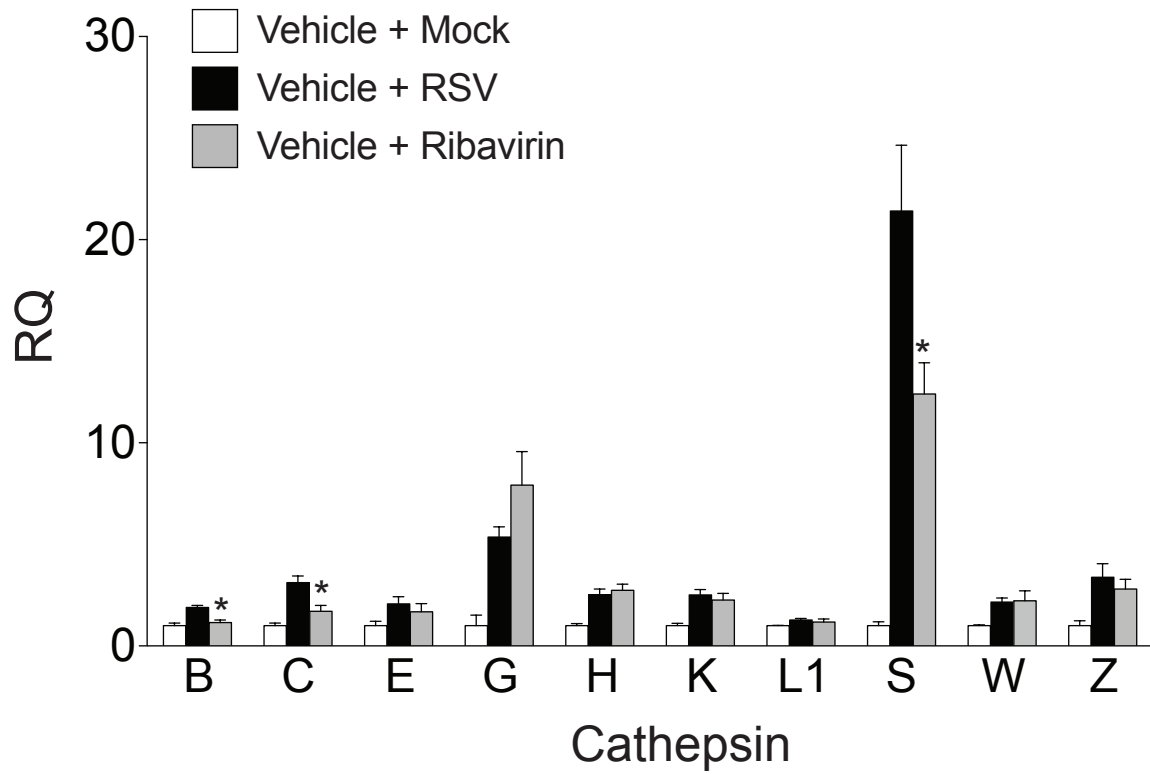

A

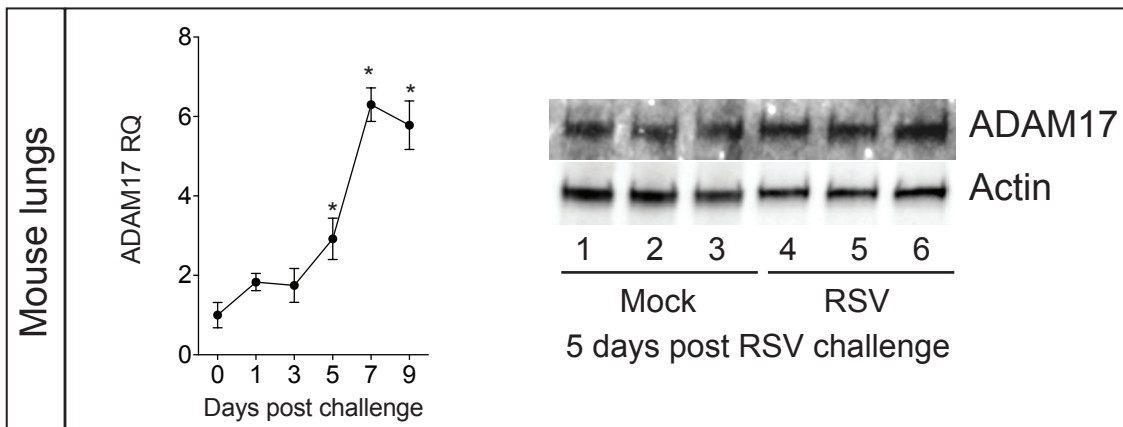

B

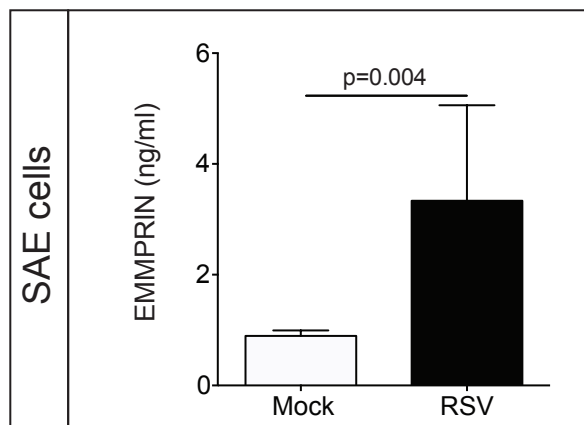

Supplement: NIHMS600119-supplement-supplement_1.pdf [file NIHMS600119-supplement-supplement_1.pdf]
